# Supplementary material for: Biodiversity pressure from fruit and vegetable consumption in the United Kingdom, India and South Africa varies by product and growing location
Source: Nat Food. 2025 Aug 25;6(9):892–905. doi: 10.1038/s43016-025-01222-y (PMC12454118; doi:10.1038/s43016-025-01222-y)
Supplement: Supplementary file 4 — Supplementary Table 1.2: Excel file with: i) mean biodiversity pressure (BP) per crop per country. [file 43016_2025_1222_MOESM4_ESM.xlsx]

## Sheet: 1.Mean_BP_per_Crop_and_Country
Country_ISO3	Country	Crop	BP
ATG	Antigua and Barbuda	apple	NA
DZA	Algeria	apple	225.168
AZE	Azerbaijan	apple	341.686
ALB	Albania	apple	222.635
ARM	Armenia	apple	312.135
AGO	Angola	apple	NA
ASM	American Samoa	apple	NA
ARG	Argentina	apple	44.492
AUS	Australia	apple	141.779
BHR	Bahrain	apple	NA
BRB	Barbados	apple	NA
BMU	Bermuda	apple	NA
BHS	Bahamas	apple	NA
BGD	Bangladesh	apple	NA
BLZ	Belize	apple	340.399
BIH	Bosnia and Herzegovina	apple	401.586
BOL	Bolivia	apple	509.081
MMR	Burma	apple	1370.64
BEN	Benin	apple	NA
SLB	Solomon Islands	apple	NA
BRA	Brazil	apple	128.996
BGR	Bulgaria	apple	211.028
BRN	Brunei Darussalam	apple	NA
CAN	Canada	apple	75.8361
KHM	Cambodia	apple	NA
LKA	Sri Lanka	apple	NA
COG	Congo	apple	NA
COD	Democratic Republic of the Congo	apple	NA
BDI	Burundi	apple	NA
CHN	China	apple	145.282
AFG	Afghanistan	apple	244.619
BTN	Bhutan	apple	983.23
CHL	Chile	apple	31.7664
CYM	Cayman Islands	apple	NA
CMR	Cameroon	apple	NA
TCD	Chad	apple	NA
COM	Comoros	apple	NA
COL	Colombia	apple	484.625
CRI	Costa Rica	apple	NA
CAF	Central African Republic	apple	NA
CUB	Cuba	apple	NA
CPV	Cape Verde	apple	NA
COK	Cook Islands	apple	NA
CYP	Cyprus	apple	NA
DNK	Denmark	apple	66.1024
DJI	Djibouti	apple	NA
DMA	Dominica	apple	NA
DOM	Dominican Republic	apple	NA
ECU	Ecuador	apple	819.637
EGY	Egypt	apple	50.8821
IRL	Ireland	apple	32.1756
GNQ	Equatorial Guinea	apple	NA
EST	Estonia	apple	905.489
ERI	Eritrea	apple	NA
SLV	El Salvador	apple	233.304
ETH	Ethiopia	apple	376.901
AUT	Austria	apple	42.2172
CZE	Czech Republic	apple	65.2066
GUF	French Guiana	apple	NA
FIN	Finland	apple	177.957
FJI	Fiji	apple	NA
FLK	Falkland Islands (Malvinas)	apple	NA
FSM	Micronesia, Federated States of	apple	NA
PYF	French Polynesia	apple	NA
FRA	France	apple	39.5026
GMB	Gambia	apple	NA
GAB	Gabon	apple	NA
GEO	Georgia	apple	630.037
GHA	Ghana	apple	NA
GRD	Grenada	apple	NA
GRL	Greenland	apple	NA
DEU	Germany	apple	51.4418
GUM	Guam	apple	NA
GRC	Greece	apple	70.4946
GTM	Guatemala	apple	246.743
GIN	Guinea	apple	NA
GUY	Guyana	apple	NA
HTI	Haiti	apple	NA
HND	Honduras	apple	382.779
HRV	Croatia	apple	150.16
HUN	Hungary	apple	106.791
ISL	Iceland	apple	NA
IND	India	apple	400.349
IRN	Iran (Islamic Republic of)	apple	84.2535
ISR	Israel	apple	127.428
ITA	Italy	apple	39.9586
CIV	Cote d'Ivoire	apple	NA
IRQ	Iraq	apple	69.7003
JPN	Japan	apple	56.0863
JAM	Jamaica	apple	NA
JOR	Jordan	apple	136.739
KEN	Kenya	apple	579.279
KGZ	Kyrgyzstan	apple	388.306
PRK	Korea, Democratic People's Republic of	apple	142.062
KIR	Kiribati	apple	NA
KOR	Korea, Republic of	apple	69.1533
KWT	Kuwait	apple	NA
KAZ	Kazakhstan	apple	708.693
LAO	Lao People's Democratic Republic	apple	1749.63
LBN	Lebanon	apple	80.7979
LVA	Latvia	apple	341.271
BLR	Belarus	apple	759.503
LTU	Lithuania	apple	396.664
LBR	Liberia	apple	NA
SVK	Slovakia	apple	75.3266
LIE	Liechtenstein	apple	27.7936
LBY	Libyan Arab Jamahiriya	apple	33.1918
MDG	Madagascar	apple	781.995
MTQ	Martinique	apple	NA
MNG	Mongolia	apple	454.717
MSR	Montserrat	apple	NA
MKD	The former Yugoslav Republic of Macedonia	apple	184.003
MLI	Mali	apple	NA
MAR	Morocco	apple	105.034
MUS	Mauritius	apple	NA
MRT	Mauritania	apple	NA
MLT	Malta	apple	NA
OMN	Oman	apple	NA
MDV	Maldives	apple	NA
MEX	Mexico	apple	255.862
MYS	Malaysia	apple	NA
MOZ	Mozambique	apple	289.922
MWI	Malawi	apple	NA
NCL	New Caledonia	apple	NA
NIU	Niue	apple	NA
NER	Niger	apple	NA
ABW	Aruba	apple	NA
AIA	Anguilla	apple	NA
BEL	Belgium	apple	46.0189
HKG	Hong Kong	apple	NA
MNP	Northern Mariana Islands	apple	NA
FRO	Faroe Islands	apple	NA
AND	Andorra	apple	38.7594
GIB	Gibraltar	apple	NA
IMN	Isle of Man	apple	NA
LUX	Luxembourg	apple	151.682
MAC	Macau	apple	NA
MCO	Monaco	apple	37.6617
PSE	Palestine	apple	144.148
MYT	Mayotte	apple	NA
ALA	Aaland Islands	apple	NA
NFK	Norfolk Island	apple	NA
CCK	Cocos (Keeling) Islands	apple	NA
ATA	Antarctica	apple	NA
BVT	Bouvet Island	apple	NA
ATF	French Southern and Antarctic Lands	apple	NA
HMD	Heard Island and McDonald Islands	apple	NA
IOT	British Indian Ocean Territory	apple	NA
CXR	Christmas Island	apple	NA
UMI	United States Minor Outlying Islands	apple	NA
VUT	Vanuatu	apple	NA
NGA	Nigeria	apple	NA
NLD	Netherlands	apple	34.754
NOR	Norway	apple	171.275
NPL	Nepal	apple	397.708
NRU	Nauru	apple	NA
SUR	Suriname	apple	NA
NIC	Nicaragua	apple	616.592
NZL	New Zealand	apple	12.48
PRY	Paraguay	apple	738.37
PER	Peru	apple	82.5878
PAK	Pakistan	apple	165.606
POL	Poland	apple	126.345
PAN	Panama	apple	668.36
PRT	Portugal	apple	107.147
PNG	Papua New Guinea	apple	NA
GNB	Guinea-Bissau	apple	NA
QAT	Qatar	apple	NA
REU	Reunion	apple	NA
ROU	Romania	apple	206.33
MDA	Republic of Moldova	apple	425.662
PHL	Philippines	apple	NA
PRI	Puerto Rico	apple	NA
RUS	Russia	apple	590.783
RWA	Rwanda	apple	NA
SAU	Saudi Arabia	apple	156.223
KNA	Saint Kitts and Nevis	apple	NA
SYC	Seychelles	apple	NA
ZAF	South Africa	apple	100.895
LSO	Lesotho	apple	67.2852
BWA	Botswana	apple	365.403
SEN	Senegal	apple	NA
SVN	Slovenia	apple	42.3438
SLE	Sierra Leone	apple	NA
SGP	Singapore	apple	NA
SOM	Somalia	apple	335.844
ESP	Spain	apple	70.7203
LCA	Saint Lucia	apple	NA
SDN	Sudan	apple	589.162
SWE	Sweden	apple	97.2076
SYR	Syrian Arab Republic	apple	86.9922
CHE	Switzerland	apple	27.8702
TTO	Trinidad and Tobago	apple	NA
THA	Thailand	apple	NA
TJK	Tajikistan	apple	602.944
TKL	Tokelau	apple	NA
TON	Tonga	apple	NA
TGO	Togo	apple	NA
STP	Sao Tome and Principe	apple	NA
TUN	Tunisia	apple	319.558
TUR	Turkey	apple	53.8613
TUV	Tuvalu	apple	NA
TKM	Turkmenistan	apple	718.032
TZA	United Republic of Tanzania	apple	787.827
UGA	Uganda	apple	583.392
GBR	United Kingdom	apple	60.2789
UKR	Ukraine	apple	577.372
USA	United States	apple	57.6252
BFA	Burkina Faso	apple	NA
URY	Uruguay	apple	133.621
UZB	Uzbekistan	apple	291.017
VCT	Saint Vincent and the Grenadines	apple	NA
VEN	Venezuela	apple	540.409
VGB	British Virgin Islands	apple	NA
VNM	Viet Nam	apple	1400.63
VIR	United States Virgin Islands	apple	NA
NAM	Namibia	apple	NA
WLF	Wallis and Futuna Islands	apple	NA
WSM	Samoa	apple	NA
SWZ	Swaziland	apple	222.073
YEM	Yemen	apple	155.514
ZMB	Zambia	apple	437.809
ZWE	Zimbabwe	apple	405.139
IDN	Indonesia	apple	NA
GLP	Guadeloupe	apple	NA
ANT	Netherlands Antilles	apple	NA
ARE	United Arab Emirates	apple	NA
TLS	Timor-Leste	apple	NA
PCN	Pitcairn Islands	apple	NA
PLW	Palau	apple	NA
MHL	Marshall Islands	apple	NA
SPM	Saint Pierre and Miquelon	apple	NA
SHN	Saint Helena	apple	NA
SMR	San Marino	apple	38.172
TCA	Turks and Caicos Islands	apple	NA
ESH	Western Sahara	apple	NA
VAT	Holy See (Vatican City)	apple	41.4867
SJM	Svalbard	apple	NA
MAF	Saint Martin	apple	NA
BLM	Saint Barthelemy	apple	NA
GGY	Guernsey	apple	NA
JEY	Jersey	apple	NA
SGS	South Georgia South Sandwich Islands	apple	NA
TWN	Taiwan	apple	175.716
SRB	NA	apple	211.149
ATG	Antigua and Barbuda	apricot	NA
DZA	Algeria	apricot	367.832
AZE	Azerbaijan	apricot	264.468
ALB	Albania	apricot	446.257
ARM	Armenia	apricot	383.234
AGO	Angola	apricot	NA
ASM	American Samoa	apricot	NA
ARG	Argentina	apricot	174.984
AUS	Australia	apricot	345.54
BHR	Bahrain	apricot	NA
BRB	Barbados	apricot	NA
BMU	Bermuda	apricot	NA
BHS	Bahamas	apricot	NA
BGD	Bangladesh	apricot	637.981
BLZ	Belize	apricot	623.309
BIH	Bosnia and Herzegovina	apricot	334.883
BOL	Bolivia	apricot	89.4224
MMR	Burma	apricot	770.998
BEN	Benin	apricot	NA
SLB	Solomon Islands	apricot	NA
BRA	Brazil	apricot	393.439
BGR	Bulgaria	apricot	807.391
BRN	Brunei Darussalam	apricot	NA
CAN	Canada	apricot	255.821
KHM	Cambodia	apricot	NA
LKA	Sri Lanka	apricot	NA
COG	Congo	apricot	922.227
COD	Democratic Republic of the Congo	apricot	NA
BDI	Burundi	apricot	NA
CHN	China	apricot	321.085
AFG	Afghanistan	apricot	303.089
BTN	Bhutan	apricot	931.757
CHL	Chile	apricot	94.2431
CYM	Cayman Islands	apricot	NA
CMR	Cameroon	apricot	847.449
TCD	Chad	apricot	595.145
COM	Comoros	apricot	NA
COL	Colombia	apricot	529.167
CRI	Costa Rica	apricot	NA
CAF	Central African Republic	apricot	717.948
CUB	Cuba	apricot	NA
CPV	Cape Verde	apricot	NA
COK	Cook Islands	apricot	NA
CYP	Cyprus	apricot	NA
DNK	Denmark	apricot	309.532
DJI	Djibouti	apricot	NA
DMA	Dominica	apricot	NA
DOM	Dominican Republic	apricot	NA
ECU	Ecuador	apricot	757.894
EGY	Egypt	apricot	68.9765
IRL	Ireland	apricot	NA
GNQ	Equatorial Guinea	apricot	NA
EST	Estonia	apricot	1181.58
ERI	Eritrea	apricot	NA
SLV	El Salvador	apricot	NA
ETH	Ethiopia	apricot	375.107
AUT	Austria	apricot	264.697
CZE	Czech Republic	apricot	535.465
GUF	French Guiana	apricot	NA
FIN	Finland	apricot	1138.08
FJI	Fiji	apricot	NA
FLK	Falkland Islands (Malvinas)	apricot	NA
FSM	Micronesia, Federated States of	apricot	NA
PYF	French Polynesia	apricot	NA
FRA	France	apricot	162.568
GMB	Gambia	apricot	NA
GAB	Gabon	apricot	NA
GEO	Georgia	apricot	1416.69
GHA	Ghana	apricot	NA
GRD	Grenada	apricot	NA
GRL	Greenland	apricot	NA
DEU	Germany	apricot	374.237
GUM	Guam	apricot	NA
GRC	Greece	apricot	106.974
GTM	Guatemala	apricot	528.834
GIN	Guinea	apricot	NA
GUY	Guyana	apricot	NA
HTI	Haiti	apricot	NA
HND	Honduras	apricot	NA
HRV	Croatia	apricot	519.833
HUN	Hungary	apricot	526.077
ISL	Iceland	apricot	NA
IND	India	apricot	517.034
IRN	Iran (Islamic Republic of)	apricot	148.201
ISR	Israel	apricot	262.744
ITA	Italy	apricot	125.381
CIV	Cote d'Ivoire	apricot	NA
IRQ	Iraq	apricot	119.74
JPN	Japan	apricot	NA
JAM	Jamaica	apricot	NA
JOR	Jordan	apricot	244.485
KEN	Kenya	apricot	576.52
KGZ	Kyrgyzstan	apricot	964.673
PRK	Korea, Democratic People's Republic of	apricot	284.865
KIR	Kiribati	apricot	NA
KOR	Korea, Republic of	apricot	NA
KWT	Kuwait	apricot	NA
KAZ	Kazakhstan	apricot	653.584
LAO	Lao People's Democratic Republic	apricot	848.49
LBN	Lebanon	apricot	186.378
LVA	Latvia	apricot	NA
BLR	Belarus	apricot	382.748
LTU	Lithuania	apricot	558.953
LBR	Liberia	apricot	NA
SVK	Slovakia	apricot	182.9
LIE	Liechtenstein	apricot	190.723
LBY	Libyan Arab Jamahiriya	apricot	153.68
MDG	Madagascar	apricot	140.828
MTQ	Martinique	apricot	NA
MNG	Mongolia	apricot	627.617
MSR	Montserrat	apricot	NA
MKD	The former Yugoslav Republic of Macedonia	apricot	250.114
MLI	Mali	apricot	NA
MAR	Morocco	apricot	162.346
MUS	Mauritius	apricot	NA
MRT	Mauritania	apricot	NA
MLT	Malta	apricot	NA
OMN	Oman	apricot	NA
MDV	Maldives	apricot	NA
MEX	Mexico	apricot	437.253
MYS	Malaysia	apricot	NA
MOZ	Mozambique	apricot	374.011
MWI	Malawi	apricot	NA
NCL	New Caledonia	apricot	NA
NIU	Niue	apricot	NA
NER	Niger	apricot	NA
ABW	Aruba	apricot	NA
AIA	Anguilla	apricot	NA
BEL	Belgium	apricot	155.678
HKG	Hong Kong	apricot	470.235
MNP	Northern Mariana Islands	apricot	NA
FRO	Faroe Islands	apricot	NA
AND	Andorra	apricot	159.774
GIB	Gibraltar	apricot	NA
IMN	Isle of Man	apricot	NA
LUX	Luxembourg	apricot	214.346
MAC	Macau	apricot	NA
MCO	Monaco	apricot	155.249
PSE	Palestine	apricot	206.64
MYT	Mayotte	apricot	NA
ALA	Aaland Islands	apricot	NA
NFK	Norfolk Island	apricot	NA
CCK	Cocos (Keeling) Islands	apricot	NA
ATA	Antarctica	apricot	NA
BVT	Bouvet Island	apricot	NA
ATF	French Southern and Antarctic Lands	apricot	NA
HMD	Heard Island and McDonald Islands	apricot	NA
IOT	British Indian Ocean Territory	apricot	NA
CXR	Christmas Island	apricot	NA
UMI	United States Minor Outlying Islands	apricot	NA
VUT	Vanuatu	apricot	NA
NGA	Nigeria	apricot	701.679
NLD	Netherlands	apricot	335.42
NOR	Norway	apricot	NA
NPL	Nepal	apricot	719.719
NRU	Nauru	apricot	NA
SUR	Suriname	apricot	NA
NIC	Nicaragua	apricot	NA
NZL	New Zealand	apricot	56.0175
PRY	Paraguay	apricot	387.221
PER	Peru	apricot	510.097
PAK	Pakistan	apricot	135.623
POL	Poland	apricot	367.394
PAN	Panama	apricot	NA
PRT	Portugal	apricot	186.828
PNG	Papua New Guinea	apricot	NA
GNB	Guinea-Bissau	apricot	NA
QAT	Qatar	apricot	NA
REU	Reunion	apricot	NA
ROU	Romania	apricot	232.005
MDA	Republic of Moldova	apricot	557.673
PHL	Philippines	apricot	NA
PRI	Puerto Rico	apricot	NA
RUS	Russia	apricot	764.887
RWA	Rwanda	apricot	NA
SAU	Saudi Arabia	apricot	618.766
KNA	Saint Kitts and Nevis	apricot	NA
SYC	Seychelles	apricot	NA
ZAF	South Africa	apricot	262.221
LSO	Lesotho	apricot	195.126
BWA	Botswana	apricot	258.977
SEN	Senegal	apricot	NA
SVN	Slovenia	apricot	147.426
SLE	Sierra Leone	apricot	NA
SGP	Singapore	apricot	NA
SOM	Somalia	apricot	334.245
ESP	Spain	apricot	221.081
LCA	Saint Lucia	apricot	NA
SDN	Sudan	apricot	586.357
SWE	Sweden	apricot	NA
SYR	Syrian Arab Republic	apricot	141.91
CHE	Switzerland	apricot	189.806
TTO	Trinidad and Tobago	apricot	NA
THA	Thailand	apricot	NA
TJK	Tajikistan	apricot	600.722
TKL	Tokelau	apricot	NA
TON	Tonga	apricot	NA
TGO	Togo	apricot	NA
STP	Sao Tome and Principe	apricot	NA
TUN	Tunisia	apricot	419.975
TUR	Turkey	apricot	177.717
TUV	Tuvalu	apricot	NA
TKM	Turkmenistan	apricot	347.375
TZA	United Republic of Tanzania	apricot	784.076
UGA	Uganda	apricot	580.614
GBR	United Kingdom	apricot	NA
UKR	Ukraine	apricot	303.829
USA	United States	apricot	109.366
BFA	Burkina Faso	apricot	NA
URY	Uruguay	apricot	253.862
UZB	Uzbekistan	apricot	356.53
VCT	Saint Vincent and the Grenadines	apricot	NA
VEN	Venezuela	apricot	NA
VGB	British Virgin Islands	apricot	NA
VNM	Viet Nam	apricot	694.808
VIR	United States Virgin Islands	apricot	NA
NAM	Namibia	apricot	181.217
WLF	Wallis and Futuna Islands	apricot	NA
WSM	Samoa	apricot	NA
SWZ	Swaziland	apricot	355.698
YEM	Yemen	apricot	513.886
ZMB	Zambia	apricot	1981.24
ZWE	Zimbabwe	apricot	869.727
IDN	Indonesia	apricot	NA
GLP	Guadeloupe	apricot	NA
ANT	Netherlands Antilles	apricot	NA
ARE	United Arab Emirates	apricot	NA
TLS	Timor-Leste	apricot	NA
PCN	Pitcairn Islands	apricot	NA
PLW	Palau	apricot	NA
MHL	Marshall Islands	apricot	NA
SPM	Saint Pierre and Miquelon	apricot	NA
SHN	Saint Helena	apricot	NA
SMR	San Marino	apricot	119.729
TCA	Turks and Caicos Islands	apricot	NA
ESH	Western Sahara	apricot	NA
VAT	Holy See (Vatican City)	apricot	130.126
SJM	Svalbard	apricot	NA
MAF	Saint Martin	apricot	NA
BLM	Saint Barthelemy	apricot	NA
GGY	Guernsey	apricot	NA
JEY	Jersey	apricot	NA
SGS	South Georgia South Sandwich Islands	apricot	NA
TWN	Taiwan	apricot	269.069
SRB	NA	apricot	210.006
ATG	Antigua and Barbuda	artichoke	NA
DZA	Algeria	artichoke	122.505
AZE	Azerbaijan	artichoke	143.754
ALB	Albania	artichoke	132.552
ARM	Armenia	artichoke	133.43
AGO	Angola	artichoke	NA
ASM	American Samoa	artichoke	NA
ARG	Argentina	artichoke	88.0492
AUS	Australia	artichoke	3.42076e-16
BHR	Bahrain	artichoke	NA
BRB	Barbados	artichoke	NA
BMU	Bermuda	artichoke	NA
BHS	Bahamas	artichoke	NA
BGD	Bangladesh	artichoke	NA
BLZ	Belize	artichoke	NA
BIH	Bosnia and Herzegovina	artichoke	NA
BOL	Bolivia	artichoke	89.0445
MMR	Burma	artichoke	856.019
BEN	Benin	artichoke	NA
SLB	Solomon Islands	artichoke	NA
BRA	Brazil	artichoke	201.021
BGR	Bulgaria	artichoke	130.33
BRN	Brunei Darussalam	artichoke	NA
CAN	Canada	artichoke	NA
KHM	Cambodia	artichoke	NA
LKA	Sri Lanka	artichoke	NA
COG	Congo	artichoke	NA
COD	Democratic Republic of the Congo	artichoke	NA
BDI	Burundi	artichoke	NA
CHN	China	artichoke	375.11
AFG	Afghanistan	artichoke	96.6651
BTN	Bhutan	artichoke	256.887
CHL	Chile	artichoke	114.814
CYM	Cayman Islands	artichoke	NA
CMR	Cameroon	artichoke	NA
TCD	Chad	artichoke	NA
COM	Comoros	artichoke	NA
COL	Colombia	artichoke	449.814
CRI	Costa Rica	artichoke	NA
CAF	Central African Republic	artichoke	NA
CUB	Cuba	artichoke	NA
CPV	Cape Verde	artichoke	NA
COK	Cook Islands	artichoke	NA
CYP	Cyprus	artichoke	NA
DNK	Denmark	artichoke	NA
DJI	Djibouti	artichoke	NA
DMA	Dominica	artichoke	NA
DOM	Dominican Republic	artichoke	NA
ECU	Ecuador	artichoke	257.109
EGY	Egypt	artichoke	45.0603
IRL	Ireland	artichoke	NA
GNQ	Equatorial Guinea	artichoke	NA
EST	Estonia	artichoke	NA
ERI	Eritrea	artichoke	NA
SLV	El Salvador	artichoke	NA
ETH	Ethiopia	artichoke	NA
AUT	Austria	artichoke	120.97
CZE	Czech Republic	artichoke	NA
GUF	French Guiana	artichoke	NA
FIN	Finland	artichoke	NA
FJI	Fiji	artichoke	NA
FLK	Falkland Islands (Malvinas)	artichoke	NA
FSM	Micronesia, Federated States of	artichoke	NA
PYF	French Polynesia	artichoke	NA
FRA	France	artichoke	229.142
GMB	Gambia	artichoke	NA
GAB	Gabon	artichoke	NA
GEO	Georgia	artichoke	131.725
GHA	Ghana	artichoke	NA
GRD	Grenada	artichoke	NA
GRL	Greenland	artichoke	NA
DEU	Germany	artichoke	240.864
GUM	Guam	artichoke	NA
GRC	Greece	artichoke	117.511
GTM	Guatemala	artichoke	NA
GIN	Guinea	artichoke	NA
GUY	Guyana	artichoke	NA
HTI	Haiti	artichoke	NA
HND	Honduras	artichoke	NA
HRV	Croatia	artichoke	NA
HUN	Hungary	artichoke	220.247
ISL	Iceland	artichoke	NA
IND	India	artichoke	440.058
IRN	Iran (Islamic Republic of)	artichoke	94.3601
ISR	Israel	artichoke	306.566
ITA	Italy	artichoke	124.471
CIV	Cote d'Ivoire	artichoke	NA
IRQ	Iraq	artichoke	63.7402
JPN	Japan	artichoke	NA
JAM	Jamaica	artichoke	NA
JOR	Jordan	artichoke	302.69
KEN	Kenya	artichoke	NA
KGZ	Kyrgyzstan	artichoke	152.606
PRK	Korea, Democratic People's Republic of	artichoke	318.681
KIR	Kiribati	artichoke	NA
KOR	Korea, Republic of	artichoke	NA
KWT	Kuwait	artichoke	NA
KAZ	Kazakhstan	artichoke	239.408
LAO	Lao People's Democratic Republic	artichoke	921.067
LBN	Lebanon	artichoke	73.3782
LVA	Latvia	artichoke	NA
BLR	Belarus	artichoke	NA
LTU	Lithuania	artichoke	NA
LBR	Liberia	artichoke	NA
SVK	Slovakia	artichoke	NA
LIE	Liechtenstein	artichoke	NA
LBY	Libyan Arab Jamahiriya	artichoke	NA
MDG	Madagascar	artichoke	NA
MTQ	Martinique	artichoke	NA
MNG	Mongolia	artichoke	274.892
MSR	Montserrat	artichoke	NA
MKD	The former Yugoslav Republic of Macedonia	artichoke	145.162
MLI	Mali	artichoke	NA
MAR	Morocco	artichoke	85.4778
MUS	Mauritius	artichoke	NA
MRT	Mauritania	artichoke	NA
MLT	Malta	artichoke	NA
OMN	Oman	artichoke	NA
MDV	Maldives	artichoke	NA
MEX	Mexico	artichoke	174.837
MYS	Malaysia	artichoke	NA
MOZ	Mozambique	artichoke	355.631
MWI	Malawi	artichoke	NA
NCL	New Caledonia	artichoke	NA
NIU	Niue	artichoke	NA
NER	Niger	artichoke	NA
ABW	Aruba	artichoke	NA
AIA	Anguilla	artichoke	NA
BEL	Belgium	artichoke	216.327
HKG	Hong Kong	artichoke	524.414
MNP	Northern Mariana Islands	artichoke	NA
FRO	Faroe Islands	artichoke	NA
AND	Andorra	artichoke	225.642
GIB	Gibraltar	artichoke	NA
IMN	Isle of Man	artichoke	NA
LUX	Luxembourg	artichoke	239.301
MAC	Macau	artichoke	NA
MCO	Monaco	artichoke	219.251
PSE	Palestine	artichoke	331.364
MYT	Mayotte	artichoke	NA
ALA	Aaland Islands	artichoke	NA
NFK	Norfolk Island	artichoke	NA
CCK	Cocos (Keeling) Islands	artichoke	NA
ATA	Antarctica	artichoke	NA
BVT	Bouvet Island	artichoke	NA
ATF	French Southern and Antarctic Lands	artichoke	NA
HMD	Heard Island and McDonald Islands	artichoke	NA
IOT	British Indian Ocean Territory	artichoke	NA
CXR	Christmas Island	artichoke	NA
UMI	United States Minor Outlying Islands	artichoke	NA
VUT	Vanuatu	artichoke	NA
NGA	Nigeria	artichoke	NA
NLD	Netherlands	artichoke	NA
NOR	Norway	artichoke	NA
NPL	Nepal	artichoke	396.999
NRU	Nauru	artichoke	NA
SUR	Suriname	artichoke	NA
NIC	Nicaragua	artichoke	NA
NZL	New Zealand	artichoke	5.24652e-19
PRY	Paraguay	artichoke	194.629
PER	Peru	artichoke	147.823
PAK	Pakistan	artichoke	51.6042
POL	Poland	artichoke	NA
PAN	Panama	artichoke	NA
PRT	Portugal	artichoke	81.708
PNG	Papua New Guinea	artichoke	NA
GNB	Guinea-Bissau	artichoke	NA
QAT	Qatar	artichoke	NA
REU	Reunion	artichoke	NA
ROU	Romania	artichoke	212.093
MDA	Republic of Moldova	artichoke	231.203
PHL	Philippines	artichoke	NA
PRI	Puerto Rico	artichoke	NA
RUS	Russia	artichoke	360.493
RWA	Rwanda	artichoke	NA
SAU	Saudi Arabia	artichoke	NA
KNA	Saint Kitts and Nevis	artichoke	NA
SYC	Seychelles	artichoke	NA
ZAF	South Africa	artichoke	333.863
LSO	Lesotho	artichoke	NA
BWA	Botswana	artichoke	283.478
SEN	Senegal	artichoke	NA
SVN	Slovenia	artichoke	152.111
SLE	Sierra Leone	artichoke	NA
SGP	Singapore	artichoke	NA
SOM	Somalia	artichoke	NA
ESP	Spain	artichoke	82.5422
LCA	Saint Lucia	artichoke	NA
SDN	Sudan	artichoke	NA
SWE	Sweden	artichoke	NA
SYR	Syrian Arab Republic	artichoke	69.733
CHE	Switzerland	artichoke	192.356
TTO	Trinidad and Tobago	artichoke	NA
THA	Thailand	artichoke	NA
TJK	Tajikistan	artichoke	156.461
TKL	Tokelau	artichoke	NA
TON	Tonga	artichoke	NA
TGO	Togo	artichoke	NA
STP	Sao Tome and Principe	artichoke	NA
TUN	Tunisia	artichoke	160.467
TUR	Turkey	artichoke	102.225
TUV	Tuvalu	artichoke	NA
TKM	Turkmenistan	artichoke	124.51
TZA	United Republic of Tanzania	artichoke	NA
UGA	Uganda	artichoke	NA
GBR	United Kingdom	artichoke	NA
UKR	Ukraine	artichoke	236.521
USA	United States	artichoke	85.2876
BFA	Burkina Faso	artichoke	NA
URY	Uruguay	artichoke	127.599
UZB	Uzbekistan	artichoke	140.845
VCT	Saint Vincent and the Grenadines	artichoke	NA
VEN	Venezuela	artichoke	NA
VGB	British Virgin Islands	artichoke	NA
VNM	Viet Nam	artichoke	783.989
VIR	United States Virgin Islands	artichoke	NA
NAM	Namibia	artichoke	NA
WLF	Wallis and Futuna Islands	artichoke	NA
WSM	Samoa	artichoke	NA
SWZ	Swaziland	artichoke	NA
YEM	Yemen	artichoke	NA
ZMB	Zambia	artichoke	339.651
ZWE	Zimbabwe	artichoke	324.817
IDN	Indonesia	artichoke	NA
GLP	Guadeloupe	artichoke	NA
ANT	Netherlands Antilles	artichoke	NA
ARE	United Arab Emirates	artichoke	NA
TLS	Timor-Leste	artichoke	NA
PCN	Pitcairn Islands	artichoke	NA
PLW	Palau	artichoke	NA
MHL	Marshall Islands	artichoke	NA
SPM	Saint Pierre and Miquelon	artichoke	NA
SHN	Saint Helena	artichoke	NA
SMR	San Marino	artichoke	118.876
TCA	Turks and Caicos Islands	artichoke	NA
ESH	Western Sahara	artichoke	NA
VAT	Holy See (Vatican City)	artichoke	129.199
SJM	Svalbard	artichoke	NA
MAF	Saint Martin	artichoke	NA
BLM	Saint Barthelemy	artichoke	NA
GGY	Guernsey	artichoke	NA
JEY	Jersey	artichoke	NA
SGS	South Georgia South Sandwich Islands	artichoke	NA
TWN	Taiwan	artichoke	299.546
SRB	NA	artichoke	218.751
ATG	Antigua and Barbuda	asparagus	NA
DZA	Algeria	asparagus	286.118
AZE	Azerbaijan	asparagus	279.51
ALB	Albania	asparagus	803.591
ARM	Armenia	asparagus	294.16
AGO	Angola	asparagus	NA
ASM	American Samoa	asparagus	NA
ARG	Argentina	asparagus	805.156
AUS	Australia	asparagus	949.559
BHR	Bahrain	asparagus	NA
BRB	Barbados	asparagus	NA
BMU	Bermuda	asparagus	NA
BHS	Bahamas	asparagus	NA
BGD	Bangladesh	asparagus	NA
BLZ	Belize	asparagus	NA
BIH	Bosnia and Herzegovina	asparagus	NA
BOL	Bolivia	asparagus	279.792
MMR	Burma	asparagus	1866.7
BEN	Benin	asparagus	NA
SLB	Solomon Islands	asparagus	NA
BRA	Brazil	asparagus	1464.58
BGR	Bulgaria	asparagus	627.847
BRN	Brunei Darussalam	asparagus	NA
CAN	Canada	asparagus	1473.25
KHM	Cambodia	asparagus	1427.15
LKA	Sri Lanka	asparagus	NA
COG	Congo	asparagus	NA
COD	Democratic Republic of the Congo	asparagus	NA
BDI	Burundi	asparagus	NA
CHN	China	asparagus	818.143
AFG	Afghanistan	asparagus	185.45
BTN	Bhutan	asparagus	547.977
CHL	Chile	asparagus	430.601
CYM	Cayman Islands	asparagus	NA
CMR	Cameroon	asparagus	NA
TCD	Chad	asparagus	NA
COM	Comoros	asparagus	NA
COL	Colombia	asparagus	1808.72
CRI	Costa Rica	asparagus	NA
CAF	Central African Republic	asparagus	NA
CUB	Cuba	asparagus	NA
CPV	Cape Verde	asparagus	NA
COK	Cook Islands	asparagus	NA
CYP	Cyprus	asparagus	NA
DNK	Denmark	asparagus	613.732
DJI	Djibouti	asparagus	NA
DMA	Dominica	asparagus	NA
DOM	Dominican Republic	asparagus	NA
ECU	Ecuador	asparagus	1918.06
EGY	Egypt	asparagus	601.484
IRL	Ireland	asparagus	681.582
GNQ	Equatorial Guinea	asparagus	NA
EST	Estonia	asparagus	NA
ERI	Eritrea	asparagus	NA
SLV	El Salvador	asparagus	NA
ETH	Ethiopia	asparagus	824.339
AUT	Austria	asparagus	558.235
CZE	Czech Republic	asparagus	439.074
GUF	French Guiana	asparagus	NA
FIN	Finland	asparagus	NA
FJI	Fiji	asparagus	NA
FLK	Falkland Islands (Malvinas)	asparagus	NA
FSM	Micronesia, Federated States of	asparagus	NA
PYF	French Polynesia	asparagus	NA
FRA	France	asparagus	984.151
GMB	Gambia	asparagus	NA
GAB	Gabon	asparagus	NA
GEO	Georgia	asparagus	810.919
GHA	Ghana	asparagus	NA
GRD	Grenada	asparagus	NA
GRL	Greenland	asparagus	NA
DEU	Germany	asparagus	746.021
GUM	Guam	asparagus	NA
GRC	Greece	asparagus	712.384
GTM	Guatemala	asparagus	NA
GIN	Guinea	asparagus	NA
GUY	Guyana	asparagus	NA
HTI	Haiti	asparagus	NA
HND	Honduras	asparagus	NA
HRV	Croatia	asparagus	681.958
HUN	Hungary	asparagus	688.475
ISL	Iceland	asparagus	NA
IND	India	asparagus	951.59
IRN	Iran (Islamic Republic of)	asparagus	183.45
ISR	Israel	asparagus	825.437
ITA	Italy	asparagus	445.703
CIV	Cote d'Ivoire	asparagus	NA
IRQ	Iraq	asparagus	159.735
JPN	Japan	asparagus	655.226
JAM	Jamaica	asparagus	NA
JOR	Jordan	asparagus	789.936
KEN	Kenya	asparagus	1266.97
KGZ	Kyrgyzstan	asparagus	560.442
PRK	Korea, Democratic People's Republic of	asparagus	693.425
KIR	Kiribati	asparagus	NA
KOR	Korea, Republic of	asparagus	NA
KWT	Kuwait	asparagus	NA
KAZ	Kazakhstan	asparagus	804.859
LAO	Lao People's Democratic Republic	asparagus	1922.25
LBN	Lebanon	asparagus	920.876
LVA	Latvia	asparagus	NA
BLR	Belarus	asparagus	423.594
LTU	Lithuania	asparagus	401.615
LBR	Liberia	asparagus	NA
SVK	Slovakia	asparagus	618.842
LIE	Liechtenstein	asparagus	NA
LBY	Libyan Arab Jamahiriya	asparagus	NA
MDG	Madagascar	asparagus	NA
MTQ	Martinique	asparagus	NA
MNG	Mongolia	asparagus	598.425
MSR	Montserrat	asparagus	NA
MKD	The former Yugoslav Republic of Macedonia	asparagus	809.058
MLI	Mali	asparagus	NA
MAR	Morocco	asparagus	269.952
MUS	Mauritius	asparagus	NA
MRT	Mauritania	asparagus	NA
MLT	Malta	asparagus	NA
OMN	Oman	asparagus	NA
MDV	Maldives	asparagus	NA
MEX	Mexico	asparagus	744.711
MYS	Malaysia	asparagus	2373.23
MOZ	Mozambique	asparagus	2919.46
MWI	Malawi	asparagus	NA
NCL	New Caledonia	asparagus	NA
NIU	Niue	asparagus	NA
NER	Niger	asparagus	NA
ABW	Aruba	asparagus	NA
AIA	Anguilla	asparagus	NA
BEL	Belgium	asparagus	466.997
HKG	Hong Kong	asparagus	1143.76
MNP	Northern Mariana Islands	asparagus	NA
FRO	Faroe Islands	asparagus	NA
AND	Andorra	asparagus	969.458
GIB	Gibraltar	asparagus	NA
IMN	Isle of Man	asparagus	NA
LUX	Luxembourg	asparagus	711.443
MAC	Macau	asparagus	NA
MCO	Monaco	asparagus	942.001
PSE	Palestine	asparagus	852.362
MYT	Mayotte	asparagus	NA
ALA	Aaland Islands	asparagus	NA
NFK	Norfolk Island	asparagus	NA
CCK	Cocos (Keeling) Islands	asparagus	NA
ATA	Antarctica	asparagus	NA
BVT	Bouvet Island	asparagus	NA
ATF	French Southern and Antarctic Lands	asparagus	NA
HMD	Heard Island and McDonald Islands	asparagus	NA
IOT	British Indian Ocean Territory	asparagus	NA
CXR	Christmas Island	asparagus	NA
UMI	United States Minor Outlying Islands	asparagus	NA
VUT	Vanuatu	asparagus	NA
NGA	Nigeria	asparagus	NA
NLD	Netherlands	asparagus	401.137
NOR	Norway	asparagus	NA
NPL	Nepal	asparagus	864.546
NRU	Nauru	asparagus	NA
SUR	Suriname	asparagus	NA
NIC	Nicaragua	asparagus	NA
NZL	New Zealand	asparagus	452.086
PRY	Paraguay	asparagus	NA
PER	Peru	asparagus	474.52
PAK	Pakistan	asparagus	108.751
POL	Poland	asparagus	590.798
PAN	Panama	asparagus	2503.22
PRT	Portugal	asparagus	670.231
PNG	Papua New Guinea	asparagus	NA
GNB	Guinea-Bissau	asparagus	NA
QAT	Qatar	asparagus	NA
REU	Reunion	asparagus	NA
ROU	Romania	asparagus	631.041
MDA	Republic of Moldova	asparagus	NA
PHL	Philippines	asparagus	765.533
PRI	Puerto Rico	asparagus	NA
RUS	Russia	asparagus	848.55
RWA	Rwanda	asparagus	NA
SAU	Saudi Arabia	asparagus	NA
KNA	Saint Kitts and Nevis	asparagus	NA
SYC	Seychelles	asparagus	NA
ZAF	South Africa	asparagus	2740.76
LSO	Lesotho	asparagus	NA
BWA	Botswana	asparagus	2327.14
SEN	Senegal	asparagus	NA
SVN	Slovenia	asparagus	554.365
SLE	Sierra Leone	asparagus	NA
SGP	Singapore	asparagus	NA
SOM	Somalia	asparagus	734.541
ESP	Spain	asparagus	677.035
LCA	Saint Lucia	asparagus	NA
SDN	Sudan	asparagus	1288.59
SWE	Sweden	asparagus	NA
SYR	Syrian Arab Republic	asparagus	899.246
CHE	Switzerland	asparagus	916.418
TTO	Trinidad and Tobago	asparagus	NA
THA	Thailand	asparagus	1500.42
TJK	Tajikistan	asparagus	351.665
TKL	Tokelau	asparagus	NA
TON	Tonga	asparagus	NA
TGO	Togo	asparagus	NA
STP	Sao Tome and Principe	asparagus	NA
TUN	Tunisia	asparagus	NA
TUR	Turkey	asparagus	756.057
TUV	Tuvalu	asparagus	NA
TKM	Turkmenistan	asparagus	233.561
TZA	United Republic of Tanzania	asparagus	1723.1
UGA	Uganda	asparagus	1275.97
GBR	United Kingdom	asparagus	1007.04
UKR	Ukraine	asparagus	727.207
USA	United States	asparagus	726.563
BFA	Burkina Faso	asparagus	NA
URY	Uruguay	asparagus	NA
UZB	Uzbekistan	asparagus	NA
VCT	Saint Vincent and the Grenadines	asparagus	NA
VEN	Venezuela	asparagus	2024
VGB	British Virgin Islands	asparagus	NA
VNM	Viet Nam	asparagus	1706.76
VIR	United States Virgin Islands	asparagus	NA
NAM	Namibia	asparagus	NA
WLF	Wallis and Futuna Islands	asparagus	NA
WSM	Samoa	asparagus	NA
SWZ	Swaziland	asparagus	NA
YEM	Yemen	asparagus	NA
ZMB	Zambia	asparagus	2788.28
ZWE	Zimbabwe	asparagus	2666.5
IDN	Indonesia	asparagus	NA
GLP	Guadeloupe	asparagus	NA
ANT	Netherlands Antilles	asparagus	NA
ARE	United Arab Emirates	asparagus	NA
TLS	Timor-Leste	asparagus	NA
PCN	Pitcairn Islands	asparagus	NA
PLW	Palau	asparagus	NA
MHL	Marshall Islands	asparagus	NA
SPM	Saint Pierre and Miquelon	asparagus	NA
SHN	Saint Helena	asparagus	NA
SMR	San Marino	asparagus	425.662
TCA	Turks and Caicos Islands	asparagus	NA
ESH	Western Sahara	asparagus	NA
VAT	Holy See (Vatican City)	asparagus	462.625
SJM	Svalbard	asparagus	NA
MAF	Saint Martin	asparagus	NA
BLM	Saint Barthelemy	asparagus	NA
GGY	Guernsey	asparagus	NA
JEY	Jersey	asparagus	NA
SGS	South Georgia South Sandwich Islands	asparagus	NA
TWN	Taiwan	asparagus	745.049
SRB	NA	asparagus	619.294
ATG	Antigua and Barbuda	avocado	NA
DZA	Algeria	avocado	74.3317
AZE	Azerbaijan	avocado	NA
ALB	Albania	avocado	182.486
ARM	Armenia	avocado	207.964
AGO	Angola	avocado	234.935
ASM	American Samoa	avocado	NA
ARG	Argentina	avocado	144.097
AUS	Australia	avocado	280.529
BHR	Bahrain	avocado	NA
BRB	Barbados	avocado	NA
BMU	Bermuda	avocado	NA
BHS	Bahamas	avocado	NA
BGD	Bangladesh	avocado	NA
BLZ	Belize	avocado	176.87
BIH	Bosnia and Herzegovina	avocado	NA
BOL	Bolivia	avocado	215.404
MMR	Burma	avocado	239.546
BEN	Benin	avocado	NA
SLB	Solomon Islands	avocado	NA
BRA	Brazil	avocado	252.98
BGR	Bulgaria	avocado	189.525
BRN	Brunei Darussalam	avocado	NA
CAN	Canada	avocado	NA
KHM	Cambodia	avocado	NA
LKA	Sri Lanka	avocado	NA
COG	Congo	avocado	257.583
COD	Democratic Republic of the Congo	avocado	260.289
BDI	Burundi	avocado	325.272
CHN	China	avocado	96.5665
AFG	Afghanistan	avocado	NA
BTN	Bhutan	avocado	NA
CHL	Chile	avocado	101.243
CYM	Cayman Islands	avocado	NA
CMR	Cameroon	avocado	486.295
TCD	Chad	avocado	338.79
COM	Comoros	avocado	NA
COL	Colombia	avocado	191.761
CRI	Costa Rica	avocado	326.771
CAF	Central African Republic	avocado	274.48
CUB	Cuba	avocado	214.376
CPV	Cape Verde	avocado	NA
COK	Cook Islands	avocado	NA
CYP	Cyprus	avocado	46.1406
DNK	Denmark	avocado	NA
DJI	Djibouti	avocado	NA
DMA	Dominica	avocado	NA
DOM	Dominican Republic	avocado	45.512
ECU	Ecuador	avocado	231.937
EGY	Egypt	avocado	27.7733
IRL	Ireland	avocado	NA
GNQ	Equatorial Guinea	avocado	NA
EST	Estonia	avocado	NA
ERI	Eritrea	avocado	243.393
SLV	El Salvador	avocado	125.296
ETH	Ethiopia	avocado	283.801
AUT	Austria	avocado	NA
CZE	Czech Republic	avocado	NA
GUF	French Guiana	avocado	876.708
FIN	Finland	avocado	NA
FJI	Fiji	avocado	NA
FLK	Falkland Islands (Malvinas)	avocado	NA
FSM	Micronesia, Federated States of	avocado	NA
PYF	French Polynesia	avocado	NA
FRA	France	avocado	109.463
GMB	Gambia	avocado	NA
GAB	Gabon	avocado	242.415
GEO	Georgia	avocado	208.975
GHA	Ghana	avocado	416.855
GRD	Grenada	avocado	NA
GRL	Greenland	avocado	NA
DEU	Germany	avocado	117.618
GUM	Guam	avocado	NA
GRC	Greece	avocado	161.782
GTM	Guatemala	avocado	154.657
GIN	Guinea	avocado	410.574
GUY	Guyana	avocado	679.978
HTI	Haiti	avocado	90.5097
HND	Honduras	avocado	182.464
HRV	Croatia	avocado	NA
HUN	Hungary	avocado	NA
ISL	Iceland	avocado	NA
IND	India	avocado	82.9548
IRN	Iran (Islamic Republic of)	avocado	169.884
ISR	Israel	avocado	38.1702
ITA	Italy	avocado	103.45
CIV	Cote d'Ivoire	avocado	447.078
IRQ	Iraq	avocado	143.227
JPN	Japan	avocado	NA
JAM	Jamaica	avocado	71.4419
JOR	Jordan	avocado	36.475
KEN	Kenya	avocado	139.753
KGZ	Kyrgyzstan	avocado	72.258
PRK	Korea, Democratic People's Republic of	avocado	86.7535
KIR	Kiribati	avocado	NA
KOR	Korea, Republic of	avocado	NA
KWT	Kuwait	avocado	NA
KAZ	Kazakhstan	avocado	99.1455
LAO	Lao People's Democratic Republic	avocado	255.949
LBN	Lebanon	avocado	46.4353
LVA	Latvia	avocado	NA
BLR	Belarus	avocado	NA
LTU	Lithuania	avocado	NA
LBR	Liberia	avocado	458.328
SVK	Slovakia	avocado	NA
LIE	Liechtenstein	avocado	NA
LBY	Libyan Arab Jamahiriya	avocado	NA
MDG	Madagascar	avocado	81.592
MTQ	Martinique	avocado	NA
MNG	Mongolia	avocado	77.3172
MSR	Montserrat	avocado	NA
MKD	The former Yugoslav Republic of Macedonia	avocado	199.847
MLI	Mali	avocado	369.094
MAR	Morocco	avocado	64.3404
MUS	Mauritius	avocado	NA
MRT	Mauritania	avocado	NA
MLT	Malta	avocado	NA
OMN	Oman	avocado	NA
MDV	Maldives	avocado	NA
MEX	Mexico	avocado	117.711
MYS	Malaysia	avocado	483.715
MOZ	Mozambique	avocado	351.177
MWI	Malawi	avocado	NA
NCL	New Caledonia	avocado	NA
NIU	Niue	avocado	NA
NER	Niger	avocado	NA
ABW	Aruba	avocado	NA
AIA	Anguilla	avocado	NA
BEL	Belgium	avocado	105.637
HKG	Hong Kong	avocado	141.635
MNP	Northern Mariana Islands	avocado	NA
FRO	Faroe Islands	avocado	NA
AND	Andorra	avocado	110.185
GIB	Gibraltar	avocado	NA
IMN	Isle of Man	avocado	NA
LUX	Luxembourg	avocado	116.855
MAC	Macau	avocado	NA
MCO	Monaco	avocado	107.064
PSE	Palestine	avocado	39.3575
MYT	Mayotte	avocado	NA
ALA	Aaland Islands	avocado	NA
NFK	Norfolk Island	avocado	NA
CCK	Cocos (Keeling) Islands	avocado	NA
ATA	Antarctica	avocado	NA
BVT	Bouvet Island	avocado	NA
ATF	French Southern and Antarctic Lands	avocado	NA
HMD	Heard Island and McDonald Islands	avocado	NA
IOT	British Indian Ocean Territory	avocado	NA
CXR	Christmas Island	avocado	NA
UMI	United States Minor Outlying Islands	avocado	NA
VUT	Vanuatu	avocado	NA
NGA	Nigeria	avocado	402.758
NLD	Netherlands	avocado	NA
NOR	Norway	avocado	NA
NPL	Nepal	avocado	NA
NRU	Nauru	avocado	NA
SUR	Suriname	avocado	844.882
NIC	Nicaragua	avocado	365.139
NZL	New Zealand	avocado	50.8886
PRY	Paraguay	avocado	348.663
PER	Peru	avocado	121.485
PAK	Pakistan	avocado	NA
POL	Poland	avocado	NA
PAN	Panama	avocado	443.31
PRT	Portugal	avocado	512.269
PNG	Papua New Guinea	avocado	NA
GNB	Guinea-Bissau	avocado	NA
QAT	Qatar	avocado	NA
REU	Reunion	avocado	NA
ROU	Romania	avocado	NA
MDA	Republic of Moldova	avocado	NA
PHL	Philippines	avocado	163.508
PRI	Puerto Rico	avocado	185.244
RUS	Russia	avocado	108.802
RWA	Rwanda	avocado	349.176
SAU	Saudi Arabia	avocado	NA
KNA	Saint Kitts and Nevis	avocado	NA
SYC	Seychelles	avocado	NA
ZAF	South Africa	avocado	297.263
LSO	Lesotho	avocado	174.255
BWA	Botswana	avocado	293.075
SEN	Senegal	avocado	NA
SVN	Slovenia	avocado	NA
SLE	Sierra Leone	avocado	NA
SGP	Singapore	avocado	NA
SOM	Somalia	avocado	83.0704
ESP	Spain	avocado	88.9125
LCA	Saint Lucia	avocado	NA
SDN	Sudan	avocado	247.747
SWE	Sweden	avocado	NA
SYR	Syrian Arab Republic	avocado	42.3815
CHE	Switzerland	avocado	121.831
TTO	Trinidad and Tobago	avocado	268.914
THA	Thailand	avocado	NA
TJK	Tajikistan	avocado	43.5596
TKL	Tokelau	avocado	NA
TON	Tonga	avocado	NA
TGO	Togo	avocado	343.054
STP	Sao Tome and Principe	avocado	NA
TUN	Tunisia	avocado	124.871
TUR	Turkey	avocado	162.409
TUV	Tuvalu	avocado	NA
TKM	Turkmenistan	avocado	NA
TZA	United Republic of Tanzania	avocado	190.053
UGA	Uganda	avocado	177.224
GBR	United Kingdom	avocado	NA
UKR	Ukraine	avocado	NA
USA	United States	avocado	105.29
BFA	Burkina Faso	avocado	331.95
URY	Uruguay	avocado	162.966
UZB	Uzbekistan	avocado	NA
VCT	Saint Vincent and the Grenadines	avocado	NA
VEN	Venezuela	avocado	387.346
VGB	British Virgin Islands	avocado	NA
VNM	Viet Nam	avocado	211.052
VIR	United States Virgin Islands	avocado	NA
NAM	Namibia	avocado	NA
WLF	Wallis and Futuna Islands	avocado	NA
WSM	Samoa	avocado	NA
SWZ	Swaziland	avocado	337.32
YEM	Yemen	avocado	NA
ZMB	Zambia	avocado	308.592
ZWE	Zimbabwe	avocado	362.869
IDN	Indonesia	avocado	395.491
GLP	Guadeloupe	avocado	NA
ANT	Netherlands Antilles	avocado	NA
ARE	United Arab Emirates	avocado	NA
TLS	Timor-Leste	avocado	135.218
PCN	Pitcairn Islands	avocado	NA
PLW	Palau	avocado	NA
MHL	Marshall Islands	avocado	NA
SPM	Saint Pierre and Miquelon	avocado	NA
SHN	Saint Helena	avocado	NA
SMR	San Marino	avocado	NA
TCA	Turks and Caicos Islands	avocado	NA
ESH	Western Sahara	avocado	NA
VAT	Holy See (Vatican City)	avocado	NA
SJM	Svalbard	avocado	NA
MAF	Saint Martin	avocado	NA
BLM	Saint Barthelemy	avocado	NA
GGY	Guernsey	avocado	NA
JEY	Jersey	avocado	NA
SGS	South Georgia South Sandwich Islands	avocado	NA
TWN	Taiwan	avocado	80.9025
SRB	NA	avocado	NA
ATG	Antigua and Barbuda	banana	NA
DZA	Algeria	banana	21.8061
AZE	Azerbaijan	banana	44.6434
ALB	Albania	banana	50.0542
ARM	Armenia	banana	28.9406
AGO	Angola	banana	244.026
ASM	American Samoa	banana	NA
ARG	Argentina	banana	114.461
AUS	Australia	banana	66.6771
BHR	Bahrain	banana	29.1745
BRB	Barbados	banana	NA
BMU	Bermuda	banana	NA
BHS	Bahamas	banana	NA
BGD	Bangladesh	banana	80.0827
BLZ	Belize	banana	61.9566
BIH	Bosnia and Herzegovina	banana	NA
BOL	Bolivia	banana	157.678
MMR	Burma	banana	226.843
BEN	Benin	banana	323.344
SLB	Solomon Islands	banana	NA
BRA	Brazil	banana	229.705
BGR	Bulgaria	banana	24.3248
BRN	Brunei Darussalam	banana	353.982
CAN	Canada	banana	NA
KHM	Cambodia	banana	336.818
LKA	Sri Lanka	banana	NA
COG	Congo	banana	269.821
COD	Democratic Republic of the Congo	banana	552.466
BDI	Burundi	banana	438.574
CHN	China	banana	70.6564
AFG	Afghanistan	banana	130.685
BTN	Bhutan	banana	162.923
CHL	Chile	banana	33.5449
CYM	Cayman Islands	banana	NA
CMR	Cameroon	banana	230.321
TCD	Chad	banana	111.608
COM	Comoros	banana	NA
COL	Colombia	banana	75.9806
CRI	Costa Rica	banana	37.3247
CAF	Central African Republic	banana	265.81
CUB	Cuba	banana	74.5008
CPV	Cape Verde	banana	NA
COK	Cook Islands	banana	NA
CYP	Cyprus	banana	15.1079
DNK	Denmark	banana	NA
DJI	Djibouti	banana	NA
DMA	Dominica	banana	NA
DOM	Dominican Republic	banana	47.1619
ECU	Ecuador	banana	60.4235
EGY	Egypt	banana	13.1117
IRL	Ireland	banana	NA
GNQ	Equatorial Guinea	banana	452.826
EST	Estonia	banana	NA
ERI	Eritrea	banana	60.2332
SLV	El Salvador	banana	121.683
ETH	Ethiopia	banana	86.9535
AUT	Austria	banana	26.2555
CZE	Czech Republic	banana	NA
GUF	French Guiana	banana	601.831
FIN	Finland	banana	NA
FJI	Fiji	banana	NA
FLK	Falkland Islands (Malvinas)	banana	NA
FSM	Micronesia, Federated States of	banana	NA
PYF	French Polynesia	banana	NA
FRA	France	banana	18.2533
GMB	Gambia	banana	84.0733
GAB	Gabon	banana	394.971
GEO	Georgia	banana	26.1622
GHA	Ghana	banana	627.304
GRD	Grenada	banana	NA
GRL	Greenland	banana	NA
DEU	Germany	banana	NA
GUM	Guam	banana	NA
GRC	Greece	banana	44.1307
GTM	Guatemala	banana	31.2807
GIN	Guinea	banana	465.117
GUY	Guyana	banana	424.208
HTI	Haiti	banana	89.7634
HND	Honduras	banana	47.2479
HRV	Croatia	banana	NA
HUN	Hungary	banana	NA
ISL	Iceland	banana	NA
IND	India	banana	44.8386
IRN	Iran (Islamic Republic of)	banana	29.3625
ISR	Israel	banana	23.7688
ITA	Italy	banana	27.0152
CIV	Cote d'Ivoire	banana	130.927
IRQ	Iraq	banana	23.4908
JPN	Japan	banana	143.573
JAM	Jamaica	banana	71.4852
JOR	Jordan	banana	38.1883
KEN	Kenya	banana	166.782
KGZ	Kyrgyzstan	banana	NA
PRK	Korea, Democratic People's Republic of	banana	NA
KIR	Kiribati	banana	NA
KOR	Korea, Republic of	banana	NA
KWT	Kuwait	banana	NA
KAZ	Kazakhstan	banana	NA
LAO	Lao People's Democratic Republic	banana	273.732
LBN	Lebanon	banana	29.2568
LVA	Latvia	banana	NA
BLR	Belarus	banana	NA
LTU	Lithuania	banana	NA
LBR	Liberia	banana	193.041
SVK	Slovakia	banana	NA
LIE	Liechtenstein	banana	NA
LBY	Libyan Arab Jamahiriya	banana	NA
MDG	Madagascar	banana	123.378
MTQ	Martinique	banana	NA
MNG	Mongolia	banana	NA
MSR	Montserrat	banana	NA
MKD	The former Yugoslav Republic of Macedonia	banana	54.8162
MLI	Mali	banana	123.281
MAR	Morocco	banana	20.574
MUS	Mauritius	banana	NA
MRT	Mauritania	banana	NA
MLT	Malta	banana	NA
OMN	Oman	banana	33.1089
MDV	Maldives	banana	NA
MEX	Mexico	banana	56.0093
MYS	Malaysia	banana	115.124
MOZ	Mozambique	banana	243.777
MWI	Malawi	banana	377.577
NCL	New Caledonia	banana	NA
NIU	Niue	banana	NA
NER	Niger	banana	50.6351
ABW	Aruba	banana	NA
AIA	Anguilla	banana	NA
BEL	Belgium	banana	NA
HKG	Hong Kong	banana	60.4669
MNP	Northern Mariana Islands	banana	NA
FRO	Faroe Islands	banana	NA
AND	Andorra	banana	NA
GIB	Gibraltar	banana	NA
IMN	Isle of Man	banana	NA
LUX	Luxembourg	banana	NA
MAC	Macau	banana	NA
MCO	Monaco	banana	NA
PSE	Palestine	banana	21.7536
MYT	Mayotte	banana	NA
ALA	Aaland Islands	banana	NA
NFK	Norfolk Island	banana	NA
CCK	Cocos (Keeling) Islands	banana	NA
ATA	Antarctica	banana	NA
BVT	Bouvet Island	banana	NA
ATF	French Southern and Antarctic Lands	banana	NA
HMD	Heard Island and McDonald Islands	banana	NA
IOT	British Indian Ocean Territory	banana	NA
CXR	Christmas Island	banana	NA
UMI	United States Minor Outlying Islands	banana	NA
VUT	Vanuatu	banana	NA
NGA	Nigeria	banana	57.5842
NLD	Netherlands	banana	NA
NOR	Norway	banana	NA
NPL	Nepal	banana	88.1565
NRU	Nauru	banana	NA
SUR	Suriname	banana	182.495
NIC	Nicaragua	banana	40.1579
NZL	New Zealand	banana	NA
PRY	Paraguay	banana	151.866
PER	Peru	banana	140.124
PAK	Pakistan	banana	173.844
POL	Poland	banana	NA
PAN	Panama	banana	45.9788
PRT	Portugal	banana	27.1045
PNG	Papua New Guinea	banana	91.9581
GNB	Guinea-Bissau	banana	218.026
QAT	Qatar	banana	NA
REU	Reunion	banana	NA
ROU	Romania	banana	NA
MDA	Republic of Moldova	banana	NA
PHL	Philippines	banana	101.226
PRI	Puerto Rico	banana	41.6028
RUS	Russia	banana	NA
RWA	Rwanda	banana	108.599
SAU	Saudi Arabia	banana	73.3218
KNA	Saint Kitts and Nevis	banana	NA
SYC	Seychelles	banana	NA
ZAF	South Africa	banana	117.11
LSO	Lesotho	banana	104.461
BWA	Botswana	banana	253.478
SEN	Senegal	banana	103.943
SVN	Slovenia	banana	33.0142
SLE	Sierra Leone	banana	123.057
SGP	Singapore	banana	112.161
SOM	Somalia	banana	67.4774
ESP	Spain	banana	16.832
LCA	Saint Lucia	banana	NA
SDN	Sudan	banana	76.7405
SWE	Sweden	banana	NA
SYR	Syrian Arab Republic	banana	33.8661
CHE	Switzerland	banana	27.9986
TTO	Trinidad and Tobago	banana	306.615
THA	Thailand	banana	122.69
TJK	Tajikistan	banana	NA
TKL	Tokelau	banana	NA
TON	Tonga	banana	NA
TGO	Togo	banana	195.922
STP	Sao Tome and Principe	banana	NA
TUN	Tunisia	banana	NA
TUR	Turkey	banana	20.3065
TUV	Tuvalu	banana	NA
TKM	Turkmenistan	banana	37.3045
TZA	United Republic of Tanzania	banana	690.001
UGA	Uganda	banana	511.371
GBR	United Kingdom	banana	NA
UKR	Ukraine	banana	NA
USA	United States	banana	41.5652
BFA	Burkina Faso	banana	90.0605
URY	Uruguay	banana	NA
UZB	Uzbekistan	banana	NA
VCT	Saint Vincent and the Grenadines	banana	NA
VEN	Venezuela	banana	122.417
VGB	British Virgin Islands	banana	NA
VNM	Viet Nam	banana	133.789
VIR	United States Virgin Islands	banana	NA
NAM	Namibia	banana	153.522
WLF	Wallis and Futuna Islands	banana	NA
WSM	Samoa	banana	NA
SWZ	Swaziland	banana	325.68
YEM	Yemen	banana	59.7713
ZMB	Zambia	banana	552.456
ZWE	Zimbabwe	banana	332.281
IDN	Indonesia	banana	122.021
GLP	Guadeloupe	banana	NA
ANT	Netherlands Antilles	banana	NA
ARE	United Arab Emirates	banana	30.4787
TLS	Timor-Leste	banana	32.7517
PCN	Pitcairn Islands	banana	NA
PLW	Palau	banana	NA
MHL	Marshall Islands	banana	NA
SPM	Saint Pierre and Miquelon	banana	NA
SHN	Saint Helena	banana	NA
SMR	San Marino	banana	25.8009
TCA	Turks and Caicos Islands	banana	NA
ESH	Western Sahara	banana	NA
VAT	Holy See (Vatican City)	banana	28.0413
SJM	Svalbard	banana	NA
MAF	Saint Martin	banana	NA
BLM	Saint Barthelemy	banana	NA
GGY	Guernsey	banana	NA
JEY	Jersey	banana	NA
SGS	South Georgia South Sandwich Islands	banana	NA
TWN	Taiwan	banana	45.1001
SRB	NA	banana	NA
ATG	Antigua and Barbuda	blueberry	NA
DZA	Algeria	blueberry	231.459
AZE	Azerbaijan	blueberry	1.90428e-18
ALB	Albania	blueberry	NA
ARM	Armenia	blueberry	1.60811e-18
AGO	Angola	blueberry	NA
ASM	American Samoa	blueberry	NA
ARG	Argentina	blueberry	NA
AUS	Australia	blueberry	NA
BHR	Bahrain	blueberry	NA
BRB	Barbados	blueberry	NA
BMU	Bermuda	blueberry	NA
BHS	Bahamas	blueberry	NA
BGD	Bangladesh	blueberry	NA
BLZ	Belize	blueberry	922.087
BIH	Bosnia and Herzegovina	blueberry	NA
BOL	Bolivia	blueberry	NA
MMR	Burma	blueberry	4.24582e-18
BEN	Benin	blueberry	NA
SLB	Solomon Islands	blueberry	NA
BRA	Brazil	blueberry	NA
BGR	Bulgaria	blueberry	85.5379
BRN	Brunei Darussalam	blueberry	NA
CAN	Canada	blueberry	433.068
KHM	Cambodia	blueberry	NA
LKA	Sri Lanka	blueberry	NA
COG	Congo	blueberry	NA
COD	Democratic Republic of the Congo	blueberry	NA
BDI	Burundi	blueberry	NA
CHN	China	blueberry	1.64352e-18
AFG	Afghanistan	blueberry	13.8385
BTN	Bhutan	blueberry	NA
CHL	Chile	blueberry	NA
CYM	Cayman Islands	blueberry	NA
CMR	Cameroon	blueberry	NA
TCD	Chad	blueberry	NA
COM	Comoros	blueberry	NA
COL	Colombia	blueberry	NA
CRI	Costa Rica	blueberry	NA
CAF	Central African Republic	blueberry	NA
CUB	Cuba	blueberry	NA
CPV	Cape Verde	blueberry	NA
COK	Cook Islands	blueberry	NA
CYP	Cyprus	blueberry	NA
DNK	Denmark	blueberry	NA
DJI	Djibouti	blueberry	NA
DMA	Dominica	blueberry	NA
DOM	Dominican Republic	blueberry	NA
ECU	Ecuador	blueberry	NA
EGY	Egypt	blueberry	1.05316e-18
IRL	Ireland	blueberry	NA
GNQ	Equatorial Guinea	blueberry	NA
EST	Estonia	blueberry	NA
ERI	Eritrea	blueberry	NA
SLV	El Salvador	blueberry	NA
ETH	Ethiopia	blueberry	NA
AUT	Austria	blueberry	132.726
CZE	Czech Republic	blueberry	249.357
GUF	French Guiana	blueberry	NA
FIN	Finland	blueberry	NA
FJI	Fiji	blueberry	NA
FLK	Falkland Islands (Malvinas)	blueberry	NA
FSM	Micronesia, Federated States of	blueberry	NA
PYF	French Polynesia	blueberry	NA
FRA	France	blueberry	131.92
GMB	Gambia	blueberry	NA
GAB	Gabon	blueberry	NA
GEO	Georgia	blueberry	1.57462e-18
GHA	Ghana	blueberry	NA
GRD	Grenada	blueberry	NA
GRL	Greenland	blueberry	NA
DEU	Germany	blueberry	276.361
GUM	Guam	blueberry	NA
GRC	Greece	blueberry	1.44688e-18
GTM	Guatemala	blueberry	782.326
GIN	Guinea	blueberry	NA
GUY	Guyana	blueberry	NA
HTI	Haiti	blueberry	NA
HND	Honduras	blueberry	NA
HRV	Croatia	blueberry	NA
HUN	Hungary	blueberry	215.754
ISL	Iceland	blueberry	NA
IND	India	blueberry	1.42637e-18
IRN	Iran (Islamic Republic of)	blueberry	1.24986e-18
ISR	Israel	blueberry	1.44857e-18
ITA	Italy	blueberry	136.566
CIV	Cote d'Ivoire	blueberry	NA
IRQ	Iraq	blueberry	1.08475e-18
JPN	Japan	blueberry	1.16602e-18
JAM	Jamaica	blueberry	NA
JOR	Jordan	blueberry	1.31721e-18
KEN	Kenya	blueberry	NA
KGZ	Kyrgyzstan	blueberry	278.877
PRK	Korea, Democratic People's Republic of	blueberry	1.19415e-18
KIR	Kiribati	blueberry	NA
KOR	Korea, Republic of	blueberry	1.08184e-18
KWT	Kuwait	blueberry	7.10317e-19
KAZ	Kazakhstan	blueberry	268.765
LAO	Lao People's Democratic Republic	blueberry	4.36156e-18
LBN	Lebanon	blueberry	1.1787e-18
LVA	Latvia	blueberry	319.444
BLR	Belarus	blueberry	306.707
LTU	Lithuania	blueberry	320.916
LBR	Liberia	blueberry	NA
SVK	Slovakia	blueberry	257.321
LIE	Liechtenstein	blueberry	NA
LBY	Libyan Arab Jamahiriya	blueberry	NA
MDG	Madagascar	blueberry	NA
MTQ	Martinique	blueberry	NA
MNG	Mongolia	blueberry	1.32534e-18
MSR	Montserrat	blueberry	NA
MKD	The former Yugoslav Republic of Macedonia	blueberry	NA
MLI	Mali	blueberry	NA
MAR	Morocco	blueberry	218.381
MUS	Mauritius	blueberry	NA
MRT	Mauritania	blueberry	NA
MLT	Malta	blueberry	NA
OMN	Oman	blueberry	NA
MDV	Maldives	blueberry	NA
MEX	Mexico	blueberry	543.275
MYS	Malaysia	blueberry	NA
MOZ	Mozambique	blueberry	NA
MWI	Malawi	blueberry	NA
NCL	New Caledonia	blueberry	NA
NIU	Niue	blueberry	NA
NER	Niger	blueberry	NA
ABW	Aruba	blueberry	NA
AIA	Anguilla	blueberry	NA
BEL	Belgium	blueberry	278.141
HKG	Hong Kong	blueberry	2.41193e-18
MNP	Northern Mariana Islands	blueberry	NA
FRO	Faroe Islands	blueberry	NA
AND	Andorra	blueberry	NA
GIB	Gibraltar	blueberry	NA
IMN	Isle of Man	blueberry	NA
LUX	Luxembourg	blueberry	NA
MAC	Macau	blueberry	NA
MCO	Monaco	blueberry	NA
PSE	Palestine	blueberry	1.49163e-18
MYT	Mayotte	blueberry	NA
ALA	Aaland Islands	blueberry	NA
NFK	Norfolk Island	blueberry	NA
CCK	Cocos (Keeling) Islands	blueberry	NA
ATA	Antarctica	blueberry	NA
BVT	Bouvet Island	blueberry	NA
ATF	French Southern and Antarctic Lands	blueberry	NA
HMD	Heard Island and McDonald Islands	blueberry	NA
IOT	British Indian Ocean Territory	blueberry	NA
CXR	Christmas Island	blueberry	NA
UMI	United States Minor Outlying Islands	blueberry	NA
VUT	Vanuatu	blueberry	NA
NGA	Nigeria	blueberry	NA
NLD	Netherlands	blueberry	266.091
NOR	Norway	blueberry	2063.11
NPL	Nepal	blueberry	NA
NRU	Nauru	blueberry	NA
SUR	Suriname	blueberry	NA
NIC	Nicaragua	blueberry	NA
NZL	New Zealand	blueberry	98.117
PRY	Paraguay	blueberry	NA
PER	Peru	blueberry	NA
PAK	Pakistan	blueberry	NA
POL	Poland	blueberry	253.173
PAN	Panama	blueberry	NA
PRT	Portugal	blueberry	NA
PNG	Papua New Guinea	blueberry	NA
GNB	Guinea-Bissau	blueberry	NA
QAT	Qatar	blueberry	NA
REU	Reunion	blueberry	NA
ROU	Romania	blueberry	206.218
MDA	Republic of Moldova	blueberry	245.718
PHL	Philippines	blueberry	NA
PRI	Puerto Rico	blueberry	NA
RUS	Russia	blueberry	339.934
RWA	Rwanda	blueberry	NA
SAU	Saudi Arabia	blueberry	NA
KNA	Saint Kitts and Nevis	blueberry	NA
SYC	Seychelles	blueberry	NA
ZAF	South Africa	blueberry	NA
LSO	Lesotho	blueberry	NA
BWA	Botswana	blueberry	NA
SEN	Senegal	blueberry	NA
SVN	Slovenia	blueberry	166.892
SLE	Sierra Leone	blueberry	NA
SGP	Singapore	blueberry	NA
SOM	Somalia	blueberry	NA
ESP	Spain	blueberry	NA
LCA	Saint Lucia	blueberry	NA
SDN	Sudan	blueberry	NA
SWE	Sweden	blueberry	2092.36
SYR	Syrian Arab Republic	blueberry	1.15006e-18
CHE	Switzerland	blueberry	141.537
TTO	Trinidad and Tobago	blueberry	NA
THA	Thailand	blueberry	NA
TJK	Tajikistan	blueberry	288.904
TKL	Tokelau	blueberry	NA
TON	Tonga	blueberry	NA
TGO	Togo	blueberry	NA
STP	Sao Tome and Principe	blueberry	NA
TUN	Tunisia	blueberry	NA
TUR	Turkey	blueberry	1.22042e-18
TUV	Tuvalu	blueberry	NA
TKM	Turkmenistan	blueberry	200.47
TZA	United Republic of Tanzania	blueberry	NA
UGA	Uganda	blueberry	NA
GBR	United Kingdom	blueberry	NA
UKR	Ukraine	blueberry	386.172
USA	United States	blueberry	192.308
BFA	Burkina Faso	blueberry	NA
URY	Uruguay	blueberry	NA
UZB	Uzbekistan	blueberry	260.048
VCT	Saint Vincent and the Grenadines	blueberry	NA
VEN	Venezuela	blueberry	NA
VGB	British Virgin Islands	blueberry	NA
VNM	Viet Nam	blueberry	3.67146e-18
VIR	United States Virgin Islands	blueberry	NA
NAM	Namibia	blueberry	NA
WLF	Wallis and Futuna Islands	blueberry	NA
WSM	Samoa	blueberry	NA
SWZ	Swaziland	blueberry	NA
YEM	Yemen	blueberry	NA
ZMB	Zambia	blueberry	NA
ZWE	Zimbabwe	blueberry	NA
IDN	Indonesia	blueberry	NA
GLP	Guadeloupe	blueberry	NA
ANT	Netherlands Antilles	blueberry	NA
ARE	United Arab Emirates	blueberry	NA
TLS	Timor-Leste	blueberry	NA
PCN	Pitcairn Islands	blueberry	NA
PLW	Palau	blueberry	NA
MHL	Marshall Islands	blueberry	NA
SPM	Saint Pierre and Miquelon	blueberry	NA
SHN	Saint Helena	blueberry	NA
SMR	San Marino	blueberry	130.428
TCA	Turks and Caicos Islands	blueberry	NA
ESH	Western Sahara	blueberry	NA
VAT	Holy See (Vatican City)	blueberry	141.753
SJM	Svalbard	blueberry	NA
MAF	Saint Martin	blueberry	NA
BLM	Saint Barthelemy	blueberry	NA
GGY	Guernsey	blueberry	NA
JEY	Jersey	blueberry	NA
SGS	South Georgia South Sandwich Islands	blueberry	NA
TWN	Taiwan	blueberry	1.7962e-18
SRB	NA	blueberry	212.612
ATG	Antigua and Barbuda	cabbage	NA
DZA	Algeria	cabbage	212.631
AZE	Azerbaijan	cabbage	217.927
ALB	Albania	cabbage	131.816
ARM	Armenia	cabbage	147.07
AGO	Angola	cabbage	334.3
ASM	American Samoa	cabbage	NA
ARG	Argentina	cabbage	93.6027
AUS	Australia	cabbage	115.722
BHR	Bahrain	cabbage	40.8996
BRB	Barbados	cabbage	NA
BMU	Bermuda	cabbage	NA
BHS	Bahamas	cabbage	NA
BGD	Bangladesh	cabbage	345.132
BLZ	Belize	cabbage	258.487
BIH	Bosnia and Herzegovina	cabbage	212.548
BOL	Bolivia	cabbage	562.791
MMR	Burma	cabbage	407.515
BEN	Benin	cabbage	479.239
SLB	Solomon Islands	cabbage	NA
BRA	Brazil	cabbage	766.151
BGR	Bulgaria	cabbage	141.098
BRN	Brunei Darussalam	cabbage	359.852
CAN	Canada	cabbage	116.88
KHM	Cambodia	cabbage	262.424
LKA	Sri Lanka	cabbage	228.952
COG	Congo	cabbage	443.408
COD	Democratic Republic of the Congo	cabbage	365.479
BDI	Burundi	cabbage	462.745
CHN	China	cabbage	153.929
AFG	Afghanistan	cabbage	219.072
BTN	Bhutan	cabbage	402.157
CHL	Chile	cabbage	57.9697
CYM	Cayman Islands	cabbage	NA
CMR	Cameroon	cabbage	481.649
TCD	Chad	cabbage	380.953
COM	Comoros	cabbage	NA
COL	Colombia	cabbage	577.273
CRI	Costa Rica	cabbage	742.107
CAF	Central African Republic	cabbage	399.508
CUB	Cuba	cabbage	92.7917
CPV	Cape Verde	cabbage	NA
COK	Cook Islands	cabbage	NA
CYP	Cyprus	cabbage	NA
DNK	Denmark	cabbage	67.3266
DJI	Djibouti	cabbage	NA
DMA	Dominica	cabbage	NA
DOM	Dominican Republic	cabbage	134.361
ECU	Ecuador	cabbage	501.448
EGY	Egypt	cabbage	52.6436
IRL	Ireland	cabbage	24.1045
GNQ	Equatorial Guinea	cabbage	613.671
EST	Estonia	cabbage	178.942
ERI	Eritrea	cabbage	366.942
SLV	El Salvador	cabbage	468.138
ETH	Ethiopia	cabbage	427.137
AUT	Austria	cabbage	58.086
CZE	Czech Republic	cabbage	73.294
GUF	French Guiana	cabbage	674.726
FIN	Finland	cabbage	103.853
FJI	Fiji	cabbage	NA
FLK	Falkland Islands (Malvinas)	cabbage	NA
FSM	Micronesia, Federated States of	cabbage	NA
PYF	French Polynesia	cabbage	NA
FRA	France	cabbage	99.7313
GMB	Gambia	cabbage	NA
GAB	Gabon	cabbage	435.845
GEO	Georgia	cabbage	365.158
GHA	Ghana	cabbage	438.663
GRD	Grenada	cabbage	NA
GRL	Greenland	cabbage	NA
DEU	Germany	cabbage	47.5375
GUM	Guam	cabbage	NA
GRC	Greece	cabbage	109.18
GTM	Guatemala	cabbage	352.515
GIN	Guinea	cabbage	NA
GUY	Guyana	cabbage	1771.43
HTI	Haiti	cabbage	281.114
HND	Honduras	cabbage	162.511
HRV	Croatia	cabbage	193.099
HUN	Hungary	cabbage	115.019
ISL	Iceland	cabbage	NA
IND	India	cabbage	170.797
IRN	Iran (Islamic Republic of)	cabbage	94.2948
ISR	Israel	cabbage	74.3594
ITA	Italy	cabbage	106.25
CIV	Cote d'Ivoire	cabbage	NA
IRQ	Iraq	cabbage	68.5662
JPN	Japan	cabbage	47.6108
JAM	Jamaica	cabbage	103.732
JOR	Jordan	cabbage	63.9131
KEN	Kenya	cabbage	406.123
KGZ	Kyrgyzstan	cabbage	129.539
PRK	Korea, Democratic People's Republic of	cabbage	113.124
KIR	Kiribati	cabbage	NA
KOR	Korea, Republic of	cabbage	31.7534
KWT	Kuwait	cabbage	27.1245
KAZ	Kazakhstan	cabbage	145.063
LAO	Lao People's Democratic Republic	cabbage	419.957
LBN	Lebanon	cabbage	54.3696
LVA	Latvia	cabbage	151.084
BLR	Belarus	cabbage	145.473
LTU	Lithuania	cabbage	133.442
LBR	Liberia	cabbage	NA
SVK	Slovakia	cabbage	143.099
LIE	Liechtenstein	cabbage	117.674
LBY	Libyan Arab Jamahiriya	cabbage	76.6088
MDG	Madagascar	cabbage	116.224
MTQ	Martinique	cabbage	NA
MNG	Mongolia	cabbage	335.998
MSR	Montserrat	cabbage	NA
MKD	The former Yugoslav Republic of Macedonia	cabbage	141.751
MLI	Mali	cabbage	263.791
MAR	Morocco	cabbage	83.7997
MUS	Mauritius	cabbage	NA
MRT	Mauritania	cabbage	NA
MLT	Malta	cabbage	NA
OMN	Oman	cabbage	22.6762
MDV	Maldives	cabbage	NA
MEX	Mexico	cabbage	107.273
MYS	Malaysia	cabbage	368.169
MOZ	Mozambique	cabbage	426.495
MWI	Malawi	cabbage	729.51
NCL	New Caledonia	cabbage	NA
NIU	Niue	cabbage	NA
NER	Niger	cabbage	352.856
ABW	Aruba	cabbage	NA
AIA	Anguilla	cabbage	NA
BEL	Belgium	cabbage	95.5533
HKG	Hong Kong	cabbage	215.163
MNP	Northern Mariana Islands	cabbage	NA
FRO	Faroe Islands	cabbage	NA
AND	Andorra	cabbage	98.3942
GIB	Gibraltar	cabbage	NA
IMN	Isle of Man	cabbage	NA
LUX	Luxembourg	cabbage	61.1205
MAC	Macau	cabbage	NA
MCO	Monaco	cabbage	95.6075
PSE	Palestine	cabbage	87.9592
MYT	Mayotte	cabbage	NA
ALA	Aaland Islands	cabbage	NA
NFK	Norfolk Island	cabbage	NA
CCK	Cocos (Keeling) Islands	cabbage	NA
ATA	Antarctica	cabbage	NA
BVT	Bouvet Island	cabbage	NA
ATF	French Southern and Antarctic Lands	cabbage	NA
HMD	Heard Island and McDonald Islands	cabbage	NA
IOT	British Indian Ocean Territory	cabbage	NA
CXR	Christmas Island	cabbage	NA
UMI	United States Minor Outlying Islands	cabbage	NA
VUT	Vanuatu	cabbage	NA
NGA	Nigeria	cabbage	433.01
NLD	Netherlands	cabbage	64.4424
NOR	Norway	cabbage	53.9096
NPL	Nepal	cabbage	392.193
NRU	Nauru	cabbage	NA
SUR	Suriname	cabbage	480.052
NIC	Nicaragua	cabbage	3018.26
NZL	New Zealand	cabbage	24.1335
PRY	Paraguay	cabbage	551.778
PER	Peru	cabbage	259.639
PAK	Pakistan	cabbage	155.557
POL	Poland	cabbage	84.6101
PAN	Panama	cabbage	394.778
PRT	Portugal	cabbage	114.582
PNG	Papua New Guinea	cabbage	NA
GNB	Guinea-Bissau	cabbage	NA
QAT	Qatar	cabbage	NA
REU	Reunion	cabbage	NA
ROU	Romania	cabbage	131.157
MDA	Republic of Moldova	cabbage	272.979
PHL	Philippines	cabbage	337.19
PRI	Puerto Rico	cabbage	89.5854
RUS	Russia	cabbage	130.426
RWA	Rwanda	cabbage	496.752
SAU	Saudi Arabia	cabbage	208.784
KNA	Saint Kitts and Nevis	cabbage	NA
SYC	Seychelles	cabbage	NA
ZAF	South Africa	cabbage	128.399
LSO	Lesotho	cabbage	87.6285
BWA	Botswana	cabbage	115.787
SEN	Senegal	cabbage	NA
SVN	Slovenia	cabbage	86.3638
SLE	Sierra Leone	cabbage	NA
SGP	Singapore	cabbage	359.804
SOM	Somalia	cabbage	236.262
ESP	Spain	cabbage	76.4233
LCA	Saint Lucia	cabbage	NA
SDN	Sudan	cabbage	417.861
SWE	Sweden	cabbage	48.4478
SYR	Syrian Arab Republic	cabbage	64.8539
CHE	Switzerland	cabbage	116.885
TTO	Trinidad and Tobago	cabbage	243.712
THA	Thailand	cabbage	422.853
TJK	Tajikistan	cabbage	153.797
TKL	Tokelau	cabbage	NA
TON	Tonga	cabbage	NA
TGO	Togo	cabbage	417.132
STP	Sao Tome and Principe	cabbage	NA
TUN	Tunisia	cabbage	177.677
TUR	Turkey	cabbage	93.2243
TUV	Tuvalu	cabbage	NA
TKM	Turkmenistan	cabbage	322.423
TZA	United Republic of Tanzania	cabbage	556.007
UGA	Uganda	cabbage	409.669
GBR	United Kingdom	cabbage	64.3508
UKR	Ukraine	cabbage	184.712
USA	United States	cabbage	102.597
BFA	Burkina Faso	cabbage	457.093
URY	Uruguay	cabbage	479.95
UZB	Uzbekistan	cabbage	89.4666
VCT	Saint Vincent and the Grenadines	cabbage	NA
VEN	Venezuela	cabbage	225.082
VGB	British Virgin Islands	cabbage	NA
VNM	Viet Nam	cabbage	291.187
VIR	United States Virgin Islands	cabbage	NA
NAM	Namibia	cabbage	108.607
WLF	Wallis and Futuna Islands	cabbage	NA
WSM	Samoa	cabbage	NA
SWZ	Swaziland	cabbage	185.633
YEM	Yemen	cabbage	170.199
ZMB	Zambia	cabbage	659.184
ZWE	Zimbabwe	cabbage	475.267
IDN	Indonesia	cabbage	288.853
GLP	Guadeloupe	cabbage	NA
ANT	Netherlands Antilles	cabbage	NA
ARE	United Arab Emirates	cabbage	26.6419
TLS	Timor-Leste	cabbage	809.904
PCN	Pitcairn Islands	cabbage	NA
PLW	Palau	cabbage	NA
MHL	Marshall Islands	cabbage	NA
SPM	Saint Pierre and Miquelon	cabbage	NA
SHN	Saint Helena	cabbage	NA
SMR	San Marino	cabbage	101.503
TCA	Turks and Caicos Islands	cabbage	NA
ESH	Western Sahara	cabbage	NA
VAT	Holy See (Vatican City)	cabbage	110.317
SJM	Svalbard	cabbage	NA
MAF	Saint Martin	cabbage	NA
BLM	Saint Barthelemy	cabbage	NA
GGY	Guernsey	cabbage	NA
JEY	Jersey	cabbage	NA
SGS	South Georgia South Sandwich Islands	cabbage	NA
TWN	Taiwan	cabbage	95.6839
SRB	NA	cabbage	194.745
ATG	Antigua and Barbuda	carob	NA
DZA	Algeria	carob	54.7647
AZE	Azerbaijan	carob	NA
ALB	Albania	carob	145.458
ARM	Armenia	carob	51.5528
AGO	Angola	carob	NA
ASM	American Samoa	carob	NA
ARG	Argentina	carob	NA
AUS	Australia	carob	9.05765e+20
BHR	Bahrain	carob	NA
BRB	Barbados	carob	NA
BMU	Bermuda	carob	NA
BHS	Bahamas	carob	NA
BGD	Bangladesh	carob	NA
BLZ	Belize	carob	587.465
BIH	Bosnia and Herzegovina	carob	243.66
BOL	Bolivia	carob	NA
MMR	Burma	carob	6.88641e-19
BEN	Benin	carob	NA
SLB	Solomon Islands	carob	NA
BRA	Brazil	carob	NA
BGR	Bulgaria	carob	103.975
BRN	Brunei Darussalam	carob	NA
CAN	Canada	carob	NA
KHM	Cambodia	carob	NA
LKA	Sri Lanka	carob	NA
COG	Congo	carob	NA
COD	Democratic Republic of the Congo	carob	NA
BDI	Burundi	carob	NA
CHN	China	carob	2.82586e-19
AFG	Afghanistan	carob	8.7557e-20
BTN	Bhutan	carob	2.11409e-19
CHL	Chile	carob	NA
CYM	Cayman Islands	carob	NA
CMR	Cameroon	carob	NA
TCD	Chad	carob	NA
COM	Comoros	carob	NA
COL	Colombia	carob	NA
CRI	Costa Rica	carob	NA
[truncated: 10,986 more rows]
