# Supplementary material for: Biodiversity pressure from fruit and vegetable consumption in the United Kingdom, India and South Africa varies by product and growing location
Source: Nat Food. 2025 Aug 25;6(9):892–905. doi: 10.1038/s43016-025-01222-y (PMC12454118; doi:10.1038/s43016-025-01222-y)
Supplement: Supplementary file 5 — Supplementary Table 1.3: Excel file with: i) biodiversity pressure associated with national consumption (BPcons) per crop for each focal country. [file 43016_2025_1222_MOESM5_ESM.xlsx]

## Sheet: all_country_bpcons_13feb
crop	country	BPcons
apple	United Kingdom	3.42791e+07
apricot	United Kingdom	NA
artichoke	United Kingdom	NA
asparagus	United Kingdom	4.94096e+06
avocado	United Kingdom	NA
banana	United Kingdom	NA
blueberry	United Kingdom	NA
cabbage	United Kingdom	2.38856e+07
carob	United Kingdom	NA
carrot	United Kingdom	1.78644e+07
cauliflower	United Kingdom	3.90418e+07
cherry	United Kingdom	3.46931e+06
chilleetc	United Kingdom	4.74666e+06
cranberry	United Kingdom	NA
cucumberetc	United Kingdom	3.21457e+06
currant	United Kingdom	1.78037e+06
date	United Kingdom	NA
eggplant	United Kingdom	NA
fig	United Kingdom	NA
garlic	United Kingdom	NA
gooseberry	United Kingdom	281171
grape	United Kingdom	6.63532e+07
grapefruitetc	United Kingdom	NA
greenbean	United Kingdom	2.08761e+07
greencorn	United Kingdom	NA
greenpea	United Kingdom	3.49486e+07
kiwi	United Kingdom	NA
lemonlime	United Kingdom	NA
lettuce	United Kingdom	2.95837e+07
mango	United Kingdom	NA
mushroom	United Kingdom	NA
okra	United Kingdom	1.53611e-18
onion	United Kingdom	1.98881e+07
orange	United Kingdom	NA
papaya	United Kingdom	NA
peachetc	United Kingdom	NA
pear	United Kingdom	9.70624e+06
persimmon	United Kingdom	NA
pineapple	United Kingdom	NA
plantain	United Kingdom	NA
plum	United Kingdom	1.8077e+07
pumpkinetc	United Kingdom	NA
quince	United Kingdom	NA
rasberry	United Kingdom	1.77794e+06
sourcherry	United Kingdom	NA
spinach	United Kingdom	NA
strawberry	United Kingdom	8.04018e+06
tangetc	United Kingdom	NA
tomato	United Kingdom	8.47974e+07
watermelon	United Kingdom	NA
apple	South Africa	3.98057e+07
apricot	South Africa	1.38096e+07
asparagus	South Africa	1.07568e+07
avocado	South Africa	9.85008e+06
banana	South Africa	3.84534e+07
cabbage	South Africa	2.35873e+07
carob	South Africa	NA
carrot	South Africa	1.67041e+07
cauliflower	South Africa	4.94092e+06
cherry	South Africa	497356
chilleetc	South Africa	NA
cucumberetc	South Africa	8.23446e+06
currant	South Africa	1.78382e-16
date	South Africa	3.28181e+16
fig	South Africa	1.26998e+06
garlic	South Africa	NA
gooseberry	South Africa	5.25964e-18
grape	South Africa	1.50223e+08
grapefruitetc	South Africa	2.27325e+07
greenbean	South Africa	2.42772e+07
greencorn	South Africa	5.15026e+07
greenpea	South Africa	7.14243e+06
kiwi	South Africa	NA
lemonlime	South Africa	1.44022e+07
lettuce	South Africa	1.24811e+07
mango	South Africa	9.2716e+06
mushroom	South Africa	22712.4
okra	South Africa	NA
onion	South Africa	6.44399e+07
orange	South Africa	9.87721e+07
papaya	South Africa	7.02966e+06
peachetc	South Africa	6.08639e+07
pear	South Africa	2.03649e+07
persimmon	South Africa	2.15632e-18
pineapple	South Africa	1.51981e+07
plantain	South Africa	NA
plum	South Africa	4.02902e+06
pumpkinetc	South Africa	7.56863e+07
quince	South Africa	95897.3
rasberry	South Africa	2356.4
sourcherry	South Africa	2.75263e-18
strawberry	South Africa	2.33095e+06
tangetc	South Africa	6.08635e+06
tomato	South Africa	8.98482e+07
watermelon	South Africa	2.04944e+07
artichoke	NA	NA
blueberry	NA	NA
cranberry	NA	NA
eggplant	NA	NA
spinach	NA	NA
apple	India	5.10397e+08
apricot	India	6.16508e+06
asparagus	India	6374.24
avocado	India	82.9548
banana	India	6.45292e+08
blueberry	India	1.42637e-18
cabbage	India	9.37004e+08
carob	India	3.35711e-19
carrot	India	8.2727e+07
cauliflower	India	1.0084e+09
cherry	India	2.97277e+06
chilleetc	India	1.99271e+07
cranberry	India	1.48018e-18
cucumberetc	India	1.13348e+08
currant	India	474.575
date	India	1.64427e+17
eggplant	India	2.05628e+09
fig	India	6.089e+06
garlic	India	9.26975e+07
gooseberry	India	1.85675e-18
grape	India	8.42981e+07
grapefruitetc	India	2.18307e+07
greenbean	India	5.22617e+08
greencorn	India	24375.8
greenpea	India	5.18502e+08
kiwi	India	NA
lemonlime	India	2.99594e+08
lettuce	India	5.52321e+08
mango	India	2.56946e+09
mushroom	India	426746
okra	India	1.06842e+09
onion	India	1.27241e+09
orange	India	2.85261e+08
papaya	India	5.80058e+08
peachetc	India	5.10213e+07
pear	India	4.50652e+07
persimmon	India	194.602
pineapple	India	2.31307e+08
plantain	India	157.679
plum	India	3.39664e+07
pumpkinetc	India	1.33002e+09
quince	India	174.06
rasberry	India	1.58052e-18
sourcherry	India	2.42468e-18
spinach	India	580.063
strawberry	India	5593.8
tangetc	India	8859.45
tomato	India	2.38243e+09
watermelon	India	7.80993e+07
artichoke	NA	NA
