# Supplementary material for: Biodiversity pressure from fruit and vegetable consumption in the United Kingdom, India and South Africa varies by product and growing location
Source: Nat Food. 2025 Aug 25;6(9):892–905. doi: 10.1038/s43016-025-01222-y (PMC12454118; doi:10.1038/s43016-025-01222-y)
Supplement: Supplementary file 6 — Supplementary Table 2: Excel file with the water content averages used to calculate dry-weight production. [file 43016_2025_1222_MOESM6_ESM.xlsx]

## Sheet: TableS2
	crop	mean_water_g
1	apple	85.56
2	apricot	86.35
3	artichoke	84.94
4	asparagus	93.22
5	avocado	73.23
6	banana	74.91
7	blueberry	84.21
8	cabbage	91.6857
9	carob	3.58
10	carrot	90.17
11	cauliflower	91.3067
12	cherry	82.25
13	chilleetc	90.7014
14	cranberry	87.32
15	cucumberetc	94.785
16	currant	82.955
17	date	20.925
18	eggplant	92.3
19	fig	79.11
20	garlic	58.58
21	gooseberry	87.87
22	grape	82.0433
23	grapefruitetc	90.89
24	greenbean	90.32
25	greencorn	76.005
26	greenonion	84.815
27	greenpea	78.86
28	kiwi	83.07
29	lemonlime	88.62
30	lettuce	92.8775
31	mango	82.13
32	melonetc	90.6067
33	mushroom	90.8243
34	okra	89.58
35	onion	89.11
36	orange	86.75
37	papaya	88.06
38	peachetc	88.23
39	pear	83.96
40	pepper	92.115
41	persimmon	72.36
42	pineapple	86
43	plantain	65.28
44	plum	87.23
45	pumpkinetc	91.08
46	quince	83.8
47	rasberry	85.75
48	sourcherry	86.13
49	spinach	91.4
50	strawberry	90.95
51	tangetc	85.875
52	tomato	94.52
53	watermelon	91.45
